# Supplementary material for: Donor Mesenchymal Stem Cells Program Bone Marrow, Altering Macrophages, and Suppressing Endometriosis in Mice
Source: Hindawi journal article supplement (doi:10.1155/2023/1598127), 2023-07-28

## Supplemental Figure 1

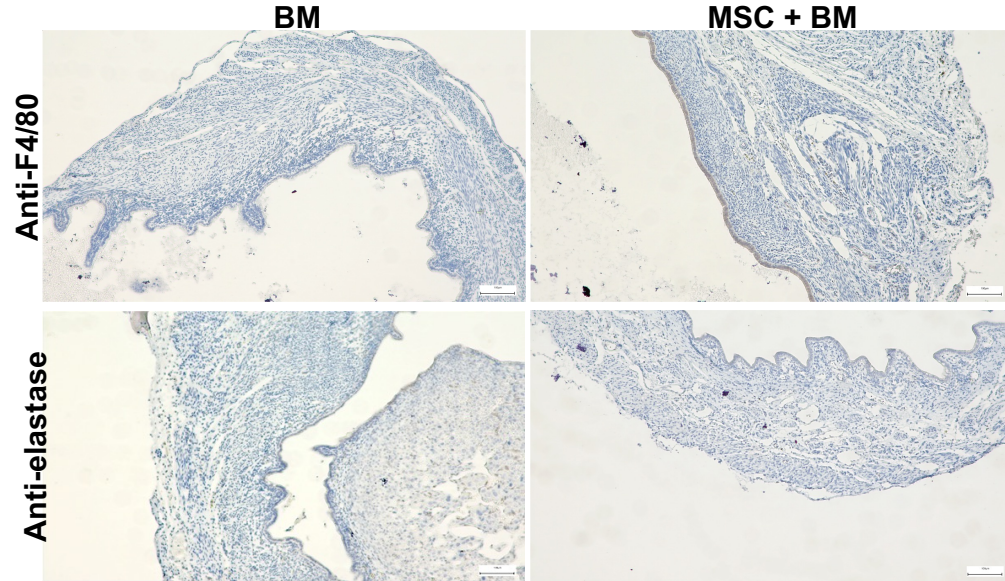

Supplement: f2 [file 1598127.f2.pdf]
